# Supplementary material
Source: publisher site journal article supplement (https://www.dovepress.com/article/331627)
Supplement: Supplementary file 1 [file get_supplementary_file.php]

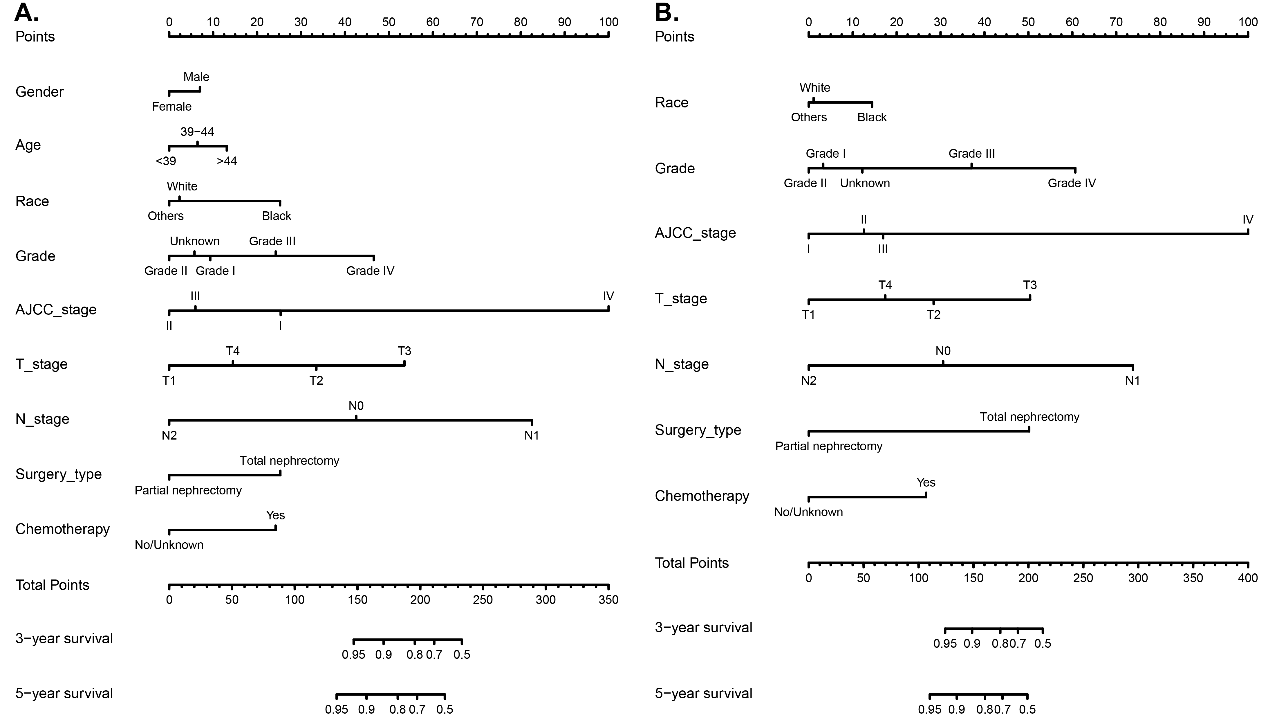


**Figure S1.** **OS and CSS associated nomograms for non-metastatic EOKC patients.** (A) OS nomograms for non-metastatic EOKC in 3- and 5-year; (B) CSS nomograms for non-metastatic EOKC in 3- and 5-year. OS, overall survival; CSS, cancer-specific survival; EOKC, early-onset kidney cancer.

**Table S1.** Baseline demographic and clinical characteristics in non-metastatic patients.

| **Variables** | **All patients**  **n (%)** | **Training set** |  | **Validation set** |
| --- | --- | --- | --- | --- |
| **n (%)** |  | **n (%)** |
| Total | 11893 | 7928 (66.7) |  | 3965 (33.3) |
| Gender |  |  |  |  |
| Male | 7225 (60.8) | 4788 (60.4) |  | 2437 (61.5) |
| Female | 4668 (39.2) | 3140 (39.6) |  | 1528 (38.5) |
| Age, years |  |  |  |  |
| <39 | 4156 (34.9) | 2774 (35.0) |  | 1382 (34.9) |
| 39-44 | 2438 (20.5) | 1659 (20.9) |  | 779 (19.6) |
| >44 | 5299 (44.6) | 3495 (44.1) |  | 1804 (45.5) |
| Race |  |  |  |  |
| White | 9481 (79.7) | 6299 (79.5) |  | 3182 (80.3) |
| Black | 1399 (11.8) | 949 (12.0) |  | 450 (11.3) |
| Others | 1013 (8.5) | 680 (8.6) |  | 33 (8.4) |
| Grade |  |  |  |  |
| Grade I | 1621 (13.6) | 1101 (13.9) |  | 520 (13.1) |
| Grade II | 5786 (48.7) | 3843 (48.5) |  | 1943 (49.0) |
| Grade III | 2375 (20.0) | 1570 (19.8) |  | 805 (20.3) |
| Grade IV | 477 (4.0) | 310 (3.9) |  | 167 (4.2) |
| Unknown | 1634 (13.7) | 1104 (13.9) |  | 530 (13.4) |
| AJCC stage |  |  |  |  |
| I | 8972 (75.4) | 5979 (75.4) |  | 2993 (75.5) |
| II | 1502 (12.6) | 1017 (12.8) |  | 485 (12.2) |
| III | 1285 (10.8) | 844 (10.6) |  | 441 (11.1) |
| IV | 134 (1.1) | 88 (1.1) |  | 46 (1.2) |
| T stage |  |  |  |  |
| T1 | 9007 (75.7) | 6006 (75.8) |  | 3001 (75.7) |
| T2 | 1550 (13.0) | 1050 (13.2) |  | 500 (12.6) |
| T3 | 1295 (10.9) | 849 (10.7) |  | 446 (11.2) |
| T4 | 41 (0.3) | 23 (0.3) |  | 18 (0.5) |
| N stage |  |  |  |  |
| N0 | 11648 (97.9) | 7761 (97.9) |  | 3887 (98.0) |
| N1 | 146 (1.2) | 97 (1.2) |  | 49 (1.2) |
| N2 | 99 (0.8) | 70 (0.9) |  | 29 (0.7) |
| Surgery type |  |  |  |  |
| Partial nephrectomy | 5098 (42.9) | 3411 (43.0) |  | 1687 (42.5) |
| Total nephrectomy | 6795 (57.1) | 4517 (57.0) |  | 2278 (57.5) |
| Histology |  |  |  |  |
| CCRCC | 7214 (60.7) | 4804 (60.6) |  | 2410 (60.8) |
| RCC-NOS | 3239 (27.2) | 2145 (27.1) |  | 1094 (27.6) |
| PRCC | 1016 (8.5) | 685 (8.6) |  | 331 (8.3) |
| Others | 424 (3.6) | 294 (3.7) |  | 130 (3.3) |
| SEER stage |  |  |  |  |
| Localized | 10474 (88.1) | 6996 (88.2) |  | 3478 (87.7) |
| Regional | 1404 (11.8) | 924 (11.7) |  | 480 (12.1) |
| Distant | 15 (0.1) | 8 (0.1) |  | 7 (0.2) |
| Chemotherapy |  |  |  |  |
| No/Unknown | 11681 (98.2) | 7785 (98.2) |  | 3896 (98.3) |
| Yes | 212 (1.8) | 143 (1.8) |  | 69 (1.7) |
| Radiotherapy |  |  |  |  |
| No/Unknown | 11847 (99.6) | 7897 (99.6) |  | 3950 (99.6) |
| Yes | 46 (0.4) | 31 (0.4) |  | 15 (0.4) |

**Abbreviations:**

AJCC, American Joint Committee on Cancer; SEER, Surveillance, Epidemiology, and End Results; RCC-NOS, Renal cell carcinoma not otherwise specified; CCRCC, Clear cell renal cell carcinoma; PRCC, Papillary renal cell carcinoma.

**Table S2.** Univariate and multivariate analysis of overall survival (OS) rates in training set for non-metastatic EOKC patients.

| **Variables** | **No. of patients** | **Univariate analysis** | | **Multivariate analysis** | |
| --- | --- | --- | --- | --- | --- |
| **P value** | | **HR (95% CI)** | **P value** |
| Gender |  | <0.001 | |  |  |
| Male | 4845 |  |  | Reference |  |
| Female | 3073 |  |  | 0.81 (0.68-0.97) | 0.019 |
| Age, years |  | <0.001 | |  |  |
| <39 | 2745 |  |  | Reference |  |
| 39-44 | 1637 |  |  | 1.22 (1.00-1.48) | 0.051 |
| >44 | 3536 |  |  | 1.49 (1.19-1.85) | <0.001 |
| Race |  | <0.001 | |  |  |
| White | 6299 |  |  | Reference |  |
| Black | 949 |  |  | 1.99 (1.53-2.44) | <0.001 |
| Others | 680 |  |  | 0.93 (0.69-1.26) | 0.644 |
| Grade |  | <0.001 | |  |  |
| Grade I | 1101 |  |  | Reference |  |
| Grade II | 3843 |  |  | 0.75 (0.56-1.02) | 0.068 |
| Grade III | 1570 |  |  | 1.57 (1.16-2.12) | 0.004 |
| Grade IV | 310 |  |  | 3.06 (2.17-4.33) | <0.001 |
| Unknown | 1104 |  |  | 0.90 (0.62-1.29) | 0.561 |
| AJCC stage |  | <0.001 | |  |  |
| I | 5979 |  |  | Reference |  |
| II | 1017 |  |  | 0.47 (0.18-1.21) | 0.119 |
| III | 844 |  |  | 0.56 (0.26-1.22) | 0.143 |
| IV | 88 |  |  | 9.29 (2.08-41.59) | 0.004 |
| T stage |  | <0.001 | |  |  |
| T1 | 6006 |  |  | Reference |  |
| T2 | 1050 |  |  | 2.72 (1.09-6.78) | 0.032 |
| T3 | 849 |  |  | 4.99 (2.38-10.45) | <0.001 |
| T4 | 23 |  |  | 1.55 (0.40-6.07) | 0.526 |
| N stage |  | <0.001 | |  |  |
| N0 | 7761 |  |  | Reference |  |
| N1 | 97 |  |  | 3.30 (2.27-4.81) | <0.001 |
| N2 | 70 |  |  | 0.28 (0.08-1.02) | 0.053 |
| Surgery type |  | <0.001 | |  |  |
| Partial nephrectomy | 3411 |  |  | Reference |  |
| Total nephrectomy | 4517 |  |  | 2.15 (1.67-2.75) | <0.001 |
| Histology |  | <0.001 | |  |  |
| CCRCC | 4804 |  |  | Reference |  |
| RCC-NOS | 2145 |  |  | - | 0.116 |
| PRCC | 685 |  |  | - | 0.072 |
| Others | 294 |  |  | - | 0.115 |
| SEER stage |  | <0.001 | |  |  |
| Localized | 6996 |  |  | Reference |  |
| Regional | 924 |  |  | - | 0.433 |
| Distant | 8 |  |  | - | 0.433 |
| Chemotherapy |  | <0.001 | |  |  |
| No/Unknown | 7785 |  |  | Reference |  |
| Yes | 143 |  |  | 2.08 (1.54-2.80) | <0.001 |
| Radiotherapy |  | <0.001 | |  |  |
| No/Unknown | 7897 |  |  | Reference |  |
| Yes | 31 |  |  | - | 0.236 |

**Abbreviations:**

OS, Overall survival; HR, hazard ratio; CI, confidence intervals; AJCC, American Joint Committee on Cancer; SEER, Surveillance, Epidemiology, and End Results; RCC-NOS, Renal cell carcinoma not otherwise specified; CCRCC, Clear cell renal cell carcinoma; PRCC, Papillary renal cell carcinoma.

**Table S3.** Univariate and multivariate analysis of cancer-specific survival (CSS) rates in training set for non-metastatic EOKC patients.

| **Variables** | **No. of patients** | **Univariate analysis** | | **Multivariate analysis** | |
| --- | --- | --- | --- | --- | --- |
| **P value** | | **HR (95% CI)** | **P value** |
| Gender |  | <0.001 | |  |  |
| Male | 4845 |  |  | Reference |  |
| Female | 3073 |  |  | - | 0.465 |
| Age, years |  | <0.001 | |  |  |
| <39 | 2745 |  |  | Reference |  |
| 39-44 | 1637 |  |  | - | 0.042 |
| >44 | 3536 |  |  | - | 0.924 |
| Race |  | <0.001 | |  |  |
| White | 6299 |  |  | Reference |  |
| Black | 949 |  |  | 1.47 (1.10-1.96) | 0.009 |
| Others | 680 |  |  | 0.97 (0.66-1.41) | 0.859 |
| Grade |  | <0.001 | |  |  |
| Grade I | 1101 |  |  | Reference |  |
| Grade II | 3843 |  |  | 0.91 (0.51-1.60) | 0.738 |
| Grade III | 1570 |  |  | 2.69 (1.56-4.62) | <0.001 |
| Grade IV | 310 |  |  | 5.34 (3.03-9.41) | <0.001 |
| Unknown | 1104 |  |  | 1.30 (0.70-2.42) | 0.411 |
| AJCC stage |  | <0.001 | |  |  |
| I | 5979 |  |  | Reference |  |
| II | 1017 |  |  | 1.45 (0.53-3.93) | 0.466 |
| III | 844 |  |  | 1.66 (0.74-3.72) | 0.219 |
| IV | 88 |  |  | 18.34 (3.93-85.70) | <0.001 |
| T stage |  | <0.001 | |  |  |
| T1 | 6006 |  |  | Reference |  |
| T2 | 1050 |  |  | 2.29 (0.90-5.82) | 0.081 |
| T3 | 849 |  |  | 4.32 (2.06-9.07) | <0.001 |
| T4 | 23 |  |  | 1.66 (0.43-6.50) | 0.466 |
| N stage |  | <0.001 | |  |  |
| N0 | 7761 |  |  | Reference |  |
| N1 | 97 |  |  | 3.50 (2.36-5.19) | <0.001 |
| N2 | 70 |  |  | 0.42 (0.11-1.53) | 0.186 |
| Surgery type |  | <0.001 | |  |  |
| Partial nephrectomy | 3411 |  |  | Reference |  |
| Total nephrectomy | 4517 |  |  | 4.35 (2.53-7.48) | <0.001 |
| Histology |  | <0.001 | |  |  |
| CCRCC | 4804 |  |  | Reference |  |
| RCC-NOS | 2145 |  |  | - | 0.171 |
| PRCC | 685 |  |  | - | 0.658 |
| Others | 294 |  |  | - | 0.073 |
| SEER stage |  | <0.001 | |  |  |
| Localized | 6996 |  |  | Reference |  |
| Regional | 924 |  |  | - | 0.567 |
| Distant | 8 |  |  | - | 0.567 |
| Chemotherapy |  | <0.001 | |  |  |
| No/Unknown | 7785 |  |  | Reference |  |
| Yes | 143 |  |  | 2.19 (1.60-2.99) | <0.001 |
| Radiotherapy |  | <0.001 | |  |  |
| No/Unknown | 7897 |  |  | Reference |  |
| Yes | 31 |  |  | - | 0.351 |

**Abbreviations:**

CSS, Cancer-specific survival; HR, hazard ratio; CI, confidence intervals; AJCC, American Joint Committee on Cancer; SEER, Surveillance, Epidemiology, and End Results; RCC-NOS, Renal cell carcinoma not otherwise specified; CCRCC, Clear cell renal cell carcinoma; PRCC, Papillary renal cell carcinoma.
